# Supplementary material
Source: bioRxiv or medRxiv preprint supplement (https://medrxiv.org/highwire/filestream/91892/field_highwire_adjunct_files/10/2020.07.31.20165654-6.pdf)
Supplement: Supplementary file [file 2020.07.31.20165654-6.pdf]

**Supplemental Table 6.** Face mask requirements put in place in the 30 most populous counties in the United States.

| Geographic Area Name (County Name)                         | Case Rate <sup>1</sup><br>(per 10,000) | Start Date<br>(2020)   | Duration<br>until May<br>10th | Days<br>late <sup>2</sup> | Cases at<br>Start <sup>3</sup> | Case<br>Rate at<br>Start <sup>4</sup> |
|------------------------------------------------------------|----------------------------------------|------------------------|-------------------------------|---------------------------|--------------------------------|---------------------------------------|
| <i>Counties with High Case Rates (High)<sup>5</sup></i>    |                                        |                        |                               |                           |                                |                                       |
| Bronx County, New York                                     | March 13 <sup>th</sup>                 | April 17 <sup>th</sup> | 23                            | 35                        | 30,746                         | 213.8                                 |
| Nassau County, New York                                    | March 17 <sup>th</sup>                 | April 17 <sup>th</sup> | 23                            | 31                        | 27,772                         | 204.7                                 |
| Queens County, New York                                    | March 13 <sup>th</sup>                 | April 17 <sup>th</sup> | 23                            | 35                        | 42,705                         | 185.8                                 |
| Suffolk County, New York                                   | March 19 <sup>th</sup>                 | April 17 <sup>th</sup> | 23                            | 29                        | 24,812                         | 166.8                                 |
| Kings County, New York                                     | March 13 <sup>th</sup>                 | April 17 <sup>th</sup> | 23                            | 35                        | 37,748                         | 145.1                                 |
| New York County, New York                                  | March 12 <sup>th</sup>                 | April 17 <sup>th</sup> | 23                            | 36                        | 17,427                         | 106.8                                 |
| Philadelphia County, Pennsylvania                          | March 23 <sup>rd</sup>                 | April 19 <sup>th</sup> | 21                            | 27                        | 9,014                          | 57.2                                  |
| Middlesex County, Massachusetts                            | March 21 <sup>st</sup>                 | May 6 <sup>th</sup>    | 4                             | 46                        | 16,264                         | 102.0                                 |
| Wayne County, Michigan                                     | March 22 <sup>nd</sup>                 | April 27 <sup>th</sup> | 13                            | 36                        | 15,944                         | 90.5                                  |
| Cook County, Illinois                                      | March 21 <sup>st</sup>                 | April 30 <sup>th</sup> | 10                            | 40                        | 34,880                         | 66.8                                  |
| <i>Counties with Moderate Case Rates (Mid)<sup>6</sup></i> |                                        |                        |                               |                           |                                |                                       |
| Miami-Dade County, Florida                                 | March 23 <sup>rd</sup>                 | April 9 <sup>th</sup>  | 41                            | 17                        | 5,354                          | 19.7                                  |
| King County, Washington                                    | March 12 <sup>th</sup>                 | May 4 <sup>th</sup>    | 6                             | 53                        | 6,449                          | 29.8                                  |
| Los Angeles County, California                             | March 26 <sup>th</sup>                 | March 19 <sup>th</sup> | 52                            | -7                        | 190                            | 0.2                                   |
| Broward County, Florida                                    | March 22 <sup>nd</sup>                 | April 10 <sup>th</sup> | 40                            | 19                        | 2,454                          | 12.9                                  |
| Palm Beach County, Florida                                 | March 26 <sup>th</sup>                 | June 20 <sup>th</sup>  | 0                             | 86                        | 10,116                         | 69.9                                  |
| Dallas County, Texas                                       | March 25 <sup>th</sup>                 | April 18 <sup>th</sup> | 22                            | 24                        | 2,190                          | 8.5                                   |
| Clark County, Nevada                                       | March 24 <sup>th</sup>                 | May 9 <sup>th</sup>    | 1                             | 46                        | 4,573                          | 21.4                                  |
| Riverside County, California                               | March 30 <sup>th</sup>                 | March 19 <sup>th</sup> | 52                            | -11                       | 16                             | 0.1                                   |
| Harris County, Texas                                       | March 28 <sup>th</sup>                 | April 13 <sup>th</sup> | 27                            | 16                        | 3,629                          | 7.9                                   |
| Tarrant County, Texas                                      | March 30 <sup>th</sup>                 | May 5 <sup>th</sup>    | 5                             | 36                        | 2,584                          | 12.8                                  |

| Geographic Area Name (County Name)                    | Case Rate <sup>1</sup> (per 10,000) | Start Date (2020)      | Duration until May 10th | Days late <sup>2</sup> | Cases at Start <sup>3</sup> | Case Rate at Start <sup>4</sup> |
|-------------------------------------------------------|-------------------------------------|------------------------|-------------------------|------------------------|-----------------------------|---------------------------------|
| <i>Counties with Low Case Rates (Low)<sup>7</sup></i> |                                     |                        |                         |                        |                             |                                 |
| San Diego County, California                          | March 27 <sup>th</sup>              | March 19 <sup>th</sup> | 52                      | -8                     | 60                          | 0.2                             |
| Maricopa County, Arizona                              | March 28 <sup>th</sup>              | June 18 <sup>th</sup>  | 0                       | 82                     | 22,272                      | 52.4                            |
| San Bernardino County, California                     | April 2 <sup>nd</sup>               | March 19 <sup>th</sup> | 52                      | -14                    | 3                           | 0.0                             |
| Alameda County, California                            | March 26 <sup>th</sup>              | March 19 <sup>th</sup> | 52                      | -7                     | 30                          | 0.2                             |
| Santa Clara County, California                        | March 19 <sup>th</sup>              | March 19 <sup>th</sup> | 52                      | 0                      | 175                         | 0.9                             |
| Orange County, Florida                                | March 27 <sup>th</sup>              | June 20 <sup>th</sup>  | 0                       | 85                     | 4,274                       | 32.3                            |
| Orange County, California                             | March 27 <sup>th</sup>              | March 19 <sup>th</sup> | 52                      | -8                     | 29                          | 0.1                             |
| Hillsborough County, Florida                          | March 26 <sup>th</sup>              | June 20 <sup>th</sup>  | 0                       | 86                     | 4,982                       | 36.1                            |
| Bexar County, Texas                                   | April 1 <sup>st</sup>               | April 16 <sup>th</sup> | 24                      | 15                     | 815                         | 4.2                             |
| Sacramento County, California                         | March 26 <sup>th</sup>              | March 19 <sup>th</sup> | 52                      | -7                     | 40                          | 0.3                             |

<sup>1</sup>The date in which the cumulative number of cases per 10,000 of the respective county population was  $\geq 1.0$ .

<sup>2</sup>The number of days after the intervention was implemented after the case rate was  $\geq 1.0$ . Negative values indicate and intervention that was implemented before the case rate was  $\geq 1.0$ .

<sup>3</sup>The cumulative number of cases when the intervention was implemented.

<sup>4</sup>The cumulative number of cases per 10,000 of the respective county population when the intervention was implemented.

<sup>5</sup>High – a case rate of  $> 100$  per 10,000.

<sup>6</sup>Mid – a case rate of 15 to 100 per 10,000.

<sup>7</sup>Low – a case rate of  $< 15$  per 10,000.
